# Supplementary material for: Metabolomic profiling reveals deep chemical divergence between two morphotypes of the zoanthid Parazoanthus axinellae
Source: PubMed Central journal article supplement (PMC4319174; doi:10.1038/srep08282), 2015-02-06
Supplement: srep08282-s1.pdf [file srep08282-s1.pdf]

## Supporting Information for

### **Metabolomic profiling reveals deep chemical divergence between two morphotypes of the zoanthid *Parazoanthus axinellae***

Nadja Cachet, Grégory Genta-Jouve, Julijana Ivanisevic, Pierre Chevaldonné, Frédéric Sinniger, Gérald Culioli, Thierry Pérez & Olivier P. Thomas

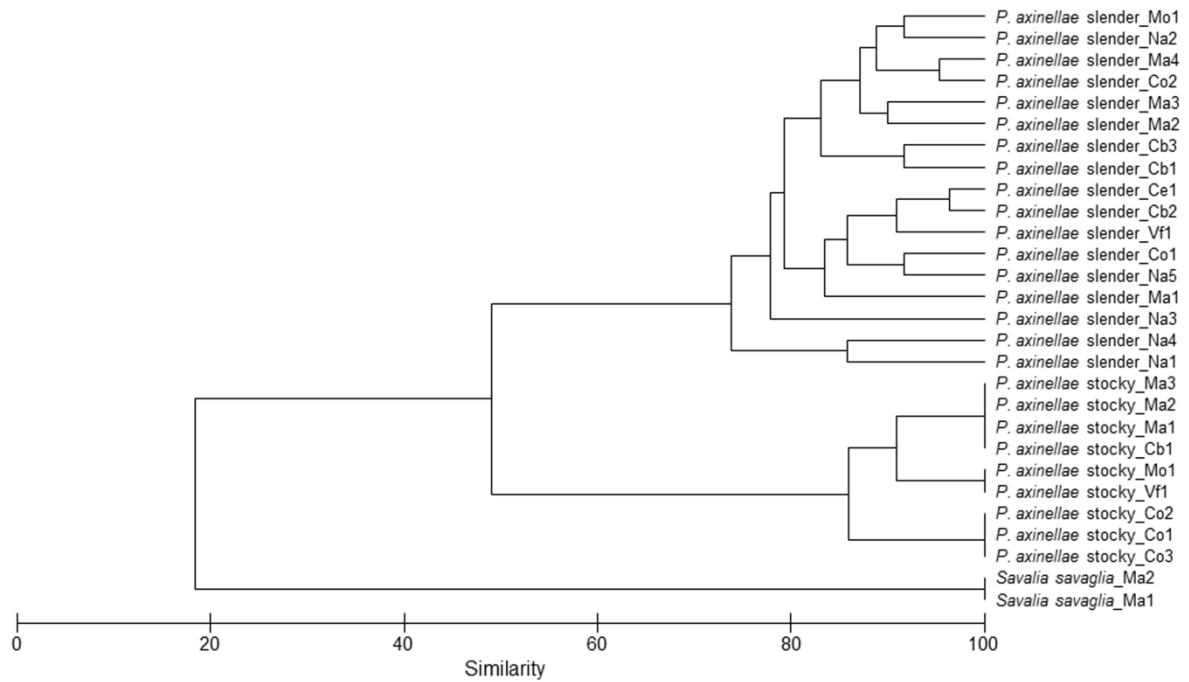

Hierarchical Cluster Analysis of the metabolomic profiles of both morphotypes of *P. axinellae*.

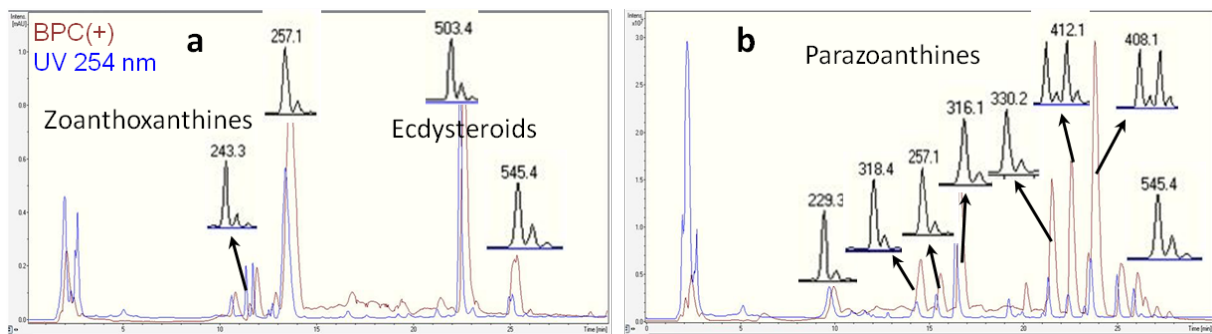

Example of HPLC-UV-MS profiles for a) the stocky morphotype and b) the slender morphotype
